# Supplementary material for: Characterization of the Poplar R2R3-MYB Gene Family and Over-Expression of PsnMYB108 Confers Salt Tolerance in Transgenic Tobacco
Source: Front Plant Sci. 2020 Oct 16;11:571881. doi: 10.3389/fpls.2020.571881 (PMC7596293; doi:10.3389/fpls.2020.571881)
Supplement: Supplementary Data set 1 — Pairwise gene expressions. Leaf (C), leaves without treatment; Stem (C), stems without treatment; Root (C), roots without treatment. The DEGs were identified using DESeq software and the thresholds were fold change ≥ 2 and padj (p-value adjusted for multiple testing) ≤ 0.05. [file Data_Sheet_1.XLSX]

## Sheet: Leaf-Root pair
id	baseMean	leaf(C)_baseMean	root(C)_baseMean	foldChange	log2FoldChange	pval	padj
Potri.019G045900.1	309.869	619.055	0.681774	0.00110131	-9.82656	1.55424e-79	2.67328e-77
Potri.017G086300.1	229.8	458.926	0.67481	0.00147041	-9.40956	2.13294e-74	1.83433e-72
Potri.017G082500.1	60.8938	121.443	0.344369	0.00283564	-8.46211	1.22836e-30	1.92071e-29
Potri.013G067500.1	145.881	288.662	3.09932	0.0107369	-6.54128	6.7998e-54	2.92391e-52
Potri.012G080400.1	10.2373	20.1373	0.337405	0.0167552	-5.89924	1.10744e-08	4.42978e-08
Potri.008G089200.1	8.60807	16.5344	0.681774	0.0412338	-4.60003	2.44642e-06	7.65061e-06
Potri.006G122100.1	175.019	334.019	16.0182	0.0479559	-4.38215	4.2319e-39	1.21315e-37
Potri.004G088100.1	191.251	364.438	18.0635	0.0495655	-4.33452	3.45907e-39	1.18992e-37
Potri.008G122100.1	158.272	301.531	15.013	0.0497891	-4.32803	3.06087e-37	7.521e-36
Potri.002G185900.1	107.214	202.465	11.9624	0.0590837	-4.0811	1.09732e-28	1.57282e-27
Potri.009G134000.1	1356.35	2540.43	172.263	0.0678086	-3.88239	2.64661e-12	1.62577e-11
Potri.006G085900.1	45.2533	83.3305	7.17604	0.0861155	-3.53758	4.07176e-12	2.33448e-11
Potri.001G258700.1	5.73606	10.4599	1.01221	0.0967708	-3.36928	0.00213749	0.00432527
Potri.004G174400.1	233.393	420.046	46.7398	0.111273	-3.16782	7.62946e-26	8.74845e-25
Potri.013G001000.1	81.8121	143.494	20.1298	0.140282	-2.83359	4.66302e-14	3.08477e-13
Potri.001G005100.1	175.308	304.29	46.3258	0.152242	-2.71556	1.77026e-19	1.60255e-18
Potri.014G100800.1	28.0567	48.6347	7.47862	0.153771	-2.70114	4.97473e-07	1.64549e-06
Potri.001G248800.1	136.199	228.351	44.0476	0.192894	-2.37412	1.0153e-14	7.59267e-14
Potri.003G219900.1	148.973	247.791	50.1557	0.202412	-2.30464	2.30158e-14	1.64946e-13
Potri.012G084100.1	57.6339	92.1014	23.1664	0.251531	-1.99119	2.51371e-06	7.72067e-06
Potri.017G128900.1	211.263	336.305	86.2201	0.256374	-1.96368	7.09929e-12	3.70024e-11
Potri.001G036000.1	47.4788	74.1878	20.7697	0.279962	-1.8367	5.36731e-05	0.000142027
Potri.013G109300.1	374.454	584.165	164.743	0.282014	-1.82616	7.83411e-10	3.45504e-09
Potri.005G087700.1	49.9874	77.8136	22.1611	0.284798	-1.81199	5.61932e-05	0.000144257
Potri.006G275900.1	10.7119	16.6583	4.76546	0.286071	-1.80555	0.00856692	0.0163723
Potri.016G112300.1	542.648	843.732	241.564	0.286304	-1.80438	2.51132e-08	9.39015e-08
Potri.017G112300.1	75.1387	115.803	34.4749	0.297704	-1.74805	2.81217e-06	8.48584e-06
Potri.009G042600.1	199.793	300.997	98.5895	0.327544	-1.61024	1.70895e-08	6.68046e-08
Potri.009G018700.1	46.7293	69.8643	23.5943	0.337717	-1.56611	0.000554572	0.00125508
Potri.014G111200.1	106.057	157.13	54.9838	0.349925	-1.51488	0.000328656	0.000763903
Potri.005G142600.1	333.762	491.529	175.995	0.358057	-1.48174	4.33411e-05	0.000116479
Potri.006G221800.1	218.726	316.097	121.356	0.38392	-1.38112	0.0166283	0.0304263
Potri.015G095000.1	633.859	896.993	370.725	0.413297	-1.27475	0.000153629	0.000372171
Potri.010G114000.1	24.4186	33.7893	15.0478	0.445342	-1.16702	0.0240564	0.0426568
Potri.013G046300.1	362.353	497.247	227.459	0.457436	-1.12836	0.000102787	0.00025999
Potri.012G055600.1	98.0223	134.313	61.7319	0.459613	-1.12151	0.000593329	0.00132536
Potri.006G097300.1	107.017	145.718	68.3167	0.468828	-1.09287	0.000474461	0.0010881
Potri.003G168900.1	441.999	593.61	290.387	0.489188	-1.03154	0.000604433	0.00133285
Potri.005G001600.1	104.504	64.3475	144.662	2.24813	1.16873	0.000311143	0.000733104
Potri.008G064200.1	111.672	53.9266	169.417	3.14163	1.65151	4.56209e-07	1.53859e-06
Potri.013G067000.1	45.8889	20.2612	71.5166	3.52973	1.81956	0.000171732	0.000410249
Potri.008G180800.1	10.66	4.57133	16.7487	3.66386	1.87337	0.0240115	0.0426568
Potri.001G219100.1	183.253	72.9945	293.511	4.02101	2.00756	1.93486e-09	8.31991e-09
Potri.010G149900.1	75.7312	29.4039	122.058	4.1511	2.05349	1.84735e-07	6.35488e-07
Potri.003G064600.1	28.1239	10.336	45.9118	4.44194	2.15119	0.00154892	0.00317785
Potri.004G086300.1	57.8216	21.0437	94.5995	4.49537	2.16844	1.97119e-06	6.2786e-06
Potri.008G148400.1	14.794	5.04407	24.5439	4.86588	2.2827	0.000871846	0.00182875
Potri.T011400.1	93.5874	31.4417	155.733	4.95308	2.30833	2.78539e-10	1.29483e-09
Potri.019G050900.1	10.3658	3.06821	17.6634	5.75692	2.5253	0.0238067	0.0426568
Potri.002G096800.1	7.95361	2.28567	13.6216	5.95955	2.5752	0.00668208	0.0130604
Potri.003G144300.1	52.8128	12.8695	92.7561	7.20744	2.84949	7.9634e-09	3.2612e-08
Potri.008G101400.1	93.0022	21.5784	164.426	7.61992	2.92978	3.46074e-14	2.38099e-13
Potri.007G093900.1	15.9647	3.00625	28.9232	9.62102	3.26619	7.00878e-06	2.00918e-05
Potri.015G082700.1	28.1683	5.10603	51.2306	10.0333	3.32673	5.9356e-06	1.73038e-05
Potri.007G067600.1	4.47843	0.782542	8.17433	10.4459	3.38486	0.0266031	0.0462195
Potri.012G127700.1	106.138	16.2865	195.99	12.0338	3.58903	4.01134e-10	1.81566e-09
Potri.002G073500.1	9.91409	1.44116	18.387	12.7584	3.67338	0.000132402	0.00032533
Potri.005G224100.1	123.706	15.341	232.071	15.1275	3.9191	3.09415e-25	3.32621e-24
Potri.001G099800.1	7.20901	0.782542	13.6355	17.4246	4.12305	0.000725365	0.00154186
Potri.005G164900.1	14.1975	1.50312	26.8918	17.8906	4.16113	1.02449e-06	3.32476e-06
Potri.006G123400.1	310.75	30.1244	591.376	19.6311	4.29507	3.53106e-36	7.59178e-35
Potri.012G140500.1	23.2556	2.22371	44.2875	19.9161	4.31586	6.36603e-09	2.67063e-08
Potri.002G173900.1	83.8334	7.51562	160.151	21.3091	4.4134	2.40625e-11	1.1825e-10
Potri.009G007100.1	17.6721	1.56508	33.7792	21.583	4.43182	4.54881e-08	1.59673e-07
Potri.005G074500.1	17.9437	1.50312	34.3843	22.8752	4.51571	3.52302e-08	1.26241e-07
Potri.001G235500.1	107.673	7.20582	208.139	28.8849	4.85224	8.12556e-28	1.07507e-26
Potri.014G117000.1	79.1051	3.06821	155.142	50.5643	5.66005	1.944e-24	1.96687e-23
Potri.014G035100.1	109.587	3.85075	215.322	55.9169	5.80521	1.19911e-32	2.06247e-31
Potri.002G191800.1	30.2276	0.782542	59.6727	76.2549	6.25276	1.08798e-12	6.93082e-12
Potri.007G007900.1	28.6087	0.720582	56.4967	78.4043	6.29286	2.74554e-12	1.62839e-11
Potri.008G166700.1	251.283	2.22371	500.343	225.004	7.81381	4.25921e-56	2.44195e-54
Potri.016G099200.1	102.878	0.782542	204.974	261.934	8.03306	1.42173e-35	2.71708e-34
Potri.002G128900.1	53.8811	0	107.762	Inf	Inf	6.94834e-21	6.63952e-20
Potri.018G095900.1	47.239	0	94.478	Inf	Inf	9.4323e-19	8.11178e-18
Potri.006G170800.1	45.1101	0	90.2202	Inf	Inf	4.10847e-18	3.36503e-17
Potri.001G336700.1	22.4916	0	44.9832	Inf	Inf	5.63029e-12	3.1239e-11
Potri.015G129100.1	22.3333	0	44.6667	Inf	Inf	6.29366e-12	3.38284e-11
Potri.002G038500.1	94.9999	0	190	Inf	Inf	2.38488e-11	1.1825e-10
Potri.010G064000.1	18.2357	0	36.4714	Inf	Inf	1.25992e-10	6.0196e-10
Potri.001G139900.1	12.5989	0	25.1978	Inf	Inf	3.5046e-08	1.26241e-07
Potri.015G033600.1	9.19699	0	18.394	Inf	Inf	3.41974e-06	1.01413e-05
Potri.008G081600.1	8.19522	0	16.3904	Inf	Inf	1.52242e-05	4.29273e-05
Potri.004G215100.1	7.33081	0	14.6616	Inf	Inf	5.55413e-05	0.000144257
Potri.007G134500.1	9.68568	0	19.3714	Inf	Inf	0.000112037	0.000279281
Potri.001G300200.1	5.63683	0	11.2737	Inf	Inf	0.000726107	0.00154186
Potri.015G041100.1	5.12375	0	10.2475	Inf	Inf	0.00155197	0.00317785
Potri.017G017600.1	4.92371	0	9.84742	Inf	Inf	0.00697719	0.013484
Potri.019G118200.1	5.93941	0	11.8788	Inf	Inf	0.0107672	0.02013
Potri.013G149200.1	3.23669	0	6.47337	Inf	Inf	0.0246737	0.0433048
Potri.002G228700.1	49.0569	98.1139	0	0	#NAME?	8.03031e-27	9.86581e-26
Potri.012G060300.1	18.82	37.6401	0	0	#NAME?	1.48152e-15	1.15828e-14
Potri.005G112000.1	17.0691	34.1381	0	0	#NAME?	2.2944e-08	8.76969e-08
Potri.004G126700.1	20.3117	40.6234	0	0	#NAME?	2.20589e-05	6.11957e-05
Potri.018G005300.1	10.7273	21.4545	0	0	#NAME?	2.5627e-05	6.99659e-05
Potri.012G140700.1	3.00625	6.0125	0	0	#NAME?	0.00590194	0.0116682
Potri.015G075600.1	3.00625	6.0125	0	0	#NAME?	0.00590194	0.0116682

## Sheet: Leaf-Stem pair
id	baseMean	leaf(C)_baseMean	stem(C)_baseMean	foldChange	log2FoldChange	pval	padj
Potri.004G033100.1	29.2615	55.9954	2.52772	0.0451416	-4.4694	9.1017e-05	0.00102546
Potri.002G228700.1	36.9837	66.9921	6.97535	0.104122	-3.26365	0.000143894	0.00151988
Potri.004G138000.1	78.3449	138.105	18.5848	0.134571	-2.89357	3.78218e-06	9.13127e-05
Potri.013G001000.1	56.87	98.0351	15.705	0.160198	-2.64208	0.000449952	0.00406057
Potri.009G134000.1	1025.05	1736.57	313.537	0.180549	-2.46954	1.05144e-09	5.92309e-08
Potri.004G088100.1	150.483	248.475	52.4907	0.211251	-2.24297	5.02294e-06	0.00010611
Potri.004G174400.1	178.931	286.83	71.0328	0.247648	-2.01364	1.45728e-05	0.00024628
Potri.001G005100.1	135.903	207.589	64.2176	0.309349	-1.69269	0.000524262	0.00443001
Potri.006G122100.1	150.168	228.071	72.2648	0.316852	-1.65812	0.00040883	0.00406057
Potri.017G086300.1	215.42	313.109	117.732	0.376009	-1.41116	0.00140501	0.010793
Potri.019G045900.1	298.629	422.613	174.644	0.413248	-1.27492	0.000964064	0.00775842
Potri.017G082500.1	216.582	82.9005	350.264	4.22511	2.07899	0.000456513	0.00406057
Potri.002G122600.1	1414.39	438.063	2390.72	5.45748	2.44824	1.79102e-13	3.02682e-11
Potri.013G067000.1	46.3043	13.827	78.7815	5.69766	2.51037	0.00151191	0.0111092
Potri.006G123400.1	72.3615	20.5379	124.185	6.04662	2.59613	7.16108e-05	0.000864445
Potri.008G064200.1	137.862	36.8208	238.904	6.4883	2.69784	2.18988e-07	7.40179e-06
Potri.001G235500.1	48.9992	4.97317	93.0252	18.7054	4.22538	6.71316e-07	1.89087e-05
Potri.014G035100.1	30.9604	2.60949	59.3114	22.7291	4.50647	2.52723e-05	0.000388275
Potri.008G166700.1	24.7269	1.52268	47.9312	31.4782	4.97628	6.86177e-05	0.000864445
Potri.007G007900.1	53.2407	0.497317	105.984	213.112	7.73547	1.37872e-11	1.16502e-09
Potri.016G099200.1	63.6072	0.528042	126.686	239.917	7.90639	5.88451e-06	0.000110498
Potri.004G102600.1	34.1966	0	68.3931	Inf	Inf	9.32424e-09	3.93949e-07
Potri.002G128900.1	23.4829	0	46.9657	Inf	Inf	5.30471e-05	0.00074708

## Sheet: Stem-Root pair
id	baseMean	stem(C)_baseMean	root(C)_baseMean	foldChange	log2FoldChange	pval	padj
Potri.017G082500.1	220.942	441.523	0.36144	0.000818622	-10.2545	8.84172e-18	8.04596e-16
Potri.019G045900.1	110.489	220.256	0.722283	0.00327928	-8.2524	2.00386e-21	3.64703e-19
Potri.017G086300.1	74.6779	148.634	0.721685	0.00485544	-7.68618	1.08923e-15	6.60797e-14
Potri.013G067500.1	87.1796	171.106	3.25296	0.0190114	-5.71699	9.34883e-14	4.25372e-12
Potri.014G081200.1	15.4928	28.4579	2.52769	0.0888222	-3.49294	0.0140097	0.0481089
Potri.008G122100.1	73.1033	130.315	15.8914	0.121946	-3.03569	9.99969e-06	9.09972e-05
Potri.002G185900.1	57.9318	103.221	12.6426	0.122481	-3.02937	7.42136e-05	0.000587256
Potri.006G122100.1	54.0498	91.1263	16.9733	0.186262	-2.4246	0.0017262	0.00952023
Potri.013G109300.1	520.265	866.091	174.439	0.20141	-2.31179	0.00462265	0.0200315
Potri.006G097300.1	211.852	351.464	72.2402	0.205541	-2.2825	0.00477379	0.0202053
Potri.005G142600.1	494.797	803.237	186.357	0.232008	-2.10776	1.82447e-08	3.01867e-07
Potri.002G122600.1	1861.1	3015.11	707.088	0.234515	-2.09225	7.16388e-11	1.86261e-09
Potri.017G128900.1	217.947	344.526	91.3667	0.265195	-1.91488	0.00164429	0.00935188
Potri.001G248800.1	101.824	157.055	46.5935	0.296671	-1.75307	0.00260832	0.0131865
Potri.012G055600.1	132.112	198.854	65.3693	0.32873	-1.60503	0.00522532	0.0216138
Potri.014G111200.1	107.96	157.767	58.1524	0.368597	-1.43988	0.0136812	0.0478842
Potri.009G042600.1	186.743	269.11	104.376	0.387856	-1.36641	0.00430552	0.0195901
Potri.016G112300.1	448.338	640.969	255.707	0.398938	-1.32577	0.00548166	0.0221703
Potri.007G048900.1	980.962	1387.63	574.299	0.413872	-1.27274	0.00392877	0.0183343
Potri.009G134000.1	288.92	395.453	182.386	0.461209	-1.11651	0.00721701	0.0277286
Potri.015G095000.1	591.79	790.672	392.908	0.496929	-1.00889	0.0120351	0.0429488
Potri.009G027300.1	365.843	200.1	531.587	2.65661	1.40958	0.000110436	0.000803977
Potri.005G001600.1	103.84	54.5454	153.135	2.80747	1.48927	0.00731304	0.0277286
Potri.014G035100.1	151.526	74.8216	228.231	3.05034	1.60897	0.00124394	0.00754655
Potri.019G081500.1	113.011	54.1301	171.892	3.17554	1.667	0.0025348	0.0131809
Potri.001G219100.1	201.076	91.5415	310.611	3.39312	1.76261	7.81943e-05	0.000592974
Potri.010G149900.1	81.4828	33.6752	129.29	3.83933	1.94085	0.00341453	0.0163538
Potri.006G123400.1	391.744	156.581	626.907	4.00372	2.00134	1.56059e-07	2.02877e-06
Potri.004G086300.1	60.715	21.047	100.383	4.76946	2.25383	0.00286282	0.014082
Potri.004G138000.1	73.1039	23.4191	122.789	5.2431	2.39042	0.00029374	0.00205618
Potri.008G101400.1	101.595	29.1103	174.08	5.98002	2.58015	2.25507e-05	0.000195439
Potri.012G127700.1	120.114	32.9045	207.323	6.30074	2.65552	5.39618e-06	5.45614e-05
Potri.002G191800.1	35.8692	8.53712	63.2012	7.40311	2.88813	0.0056648	0.0224129
Potri.015G129100.1	26.5603	5.81011	47.3104	8.14277	3.02552	0.00971488	0.0360838
Potri.008G166700.1	295.145	60.4738	529.817	8.76109	3.13111	1.04664e-12	3.80977e-11
Potri.014G117000.1	89.8688	15.415	164.323	10.6599	3.41413	2.40656e-07	2.91996e-06
Potri.005G224100.1	133.667	21.4025	245.931	11.4907	3.5224	2.75214e-09	5.0089e-08
Potri.002G173900.1	91.4581	13.5173	169.399	12.532	3.64755	1.54918e-07	2.02877e-06
Potri.T011400.1	87.9137	10.7903	165.037	15.295	3.93498	2.43872e-08	3.69873e-07
Potri.006G170800.1	50.6327	5.57291	95.6926	17.171	4.10191	8.93686e-06	8.56057e-05
Potri.004G033100.1	29.9496	3.20142	56.6977	17.7102	4.14651	0.000576498	0.00388602
Potri.001G336700.1	24.9019	2.13428	47.6695	22.3351	4.48124	0.00092722	0.0058191
Potri.003G144300.1	50.7174	3.20142	98.2334	30.6843	4.93943	5.79994e-07	6.59744e-06
Potri.010G064000.1	19.8545	1.06714	38.6418	36.2106	5.17834	0.00131351	0.00771155
Potri.005G074500.1	18.6211	0.770778	36.4714	47.3176	5.56431	0.000794724	0.00516571
Potri.005G164900.1	14.5302	0.53357	28.5269	53.4642	5.7405	0.00449029	0.0199325
Potri.002G038500.1	101.484	2.13428	200.835	94.0995	6.55611	4.54602e-10	1.03422e-08
Potri.018G095900.1	50.2871	0.53357	100.041	187.493	7.55069	1.77873e-09	3.59699e-08
Potri.002G073500.1	9.74992	0	19.4998	Inf	Inf	0.0116917	0.0425578
Potri.004G102600.1	43.1322	86.2644	0	0	#NAME?	6.19464e-11	1.86261e-09
Potri.012G140700.1	22.1739	44.3478	0	0	#NAME?	4.13274e-06	4.42446e-05
Potri.018G005300.1	18.2011	36.4022	0	0	#NAME?	5.5942e-05	0.000462793
Potri.004G126700.1	10.9979	21.9959	0	0	#NAME?	0.00191159	0.0102326
