# Supplementary material for: Characterization of the Poplar R2R3-MYB Gene Family and Over-Expression of PsnMYB108 Confers Salt Tolerance in Transgenic Tobacco
Source: Front Plant Sci. 2020 Oct 16;11:571881. doi: 10.3389/fpls.2020.571881 (PMC7596293; doi:10.3389/fpls.2020.571881)
Supplement: Supplementary Data set 2 — DEGs in response to salt stress. Leaf (C), leaves without treatment; Stem (C), stems without treatment; Root (C), roots without treatment; Leaf (T), leaves with salt treatment; Stem (T), stems with salt treatment; Root (T), roots with salt treatment. DEGs were identified using DESeq software and the thresholds were fold change ≥ 2 and padj (p-value adjusted for multiple testing) ≤ 0.05. [file Data_Sheet_2.XLSX]

## Sheet: Leaf
id	baseMean	leaf(C)_baseMean	leaf(T)_baseMean	foldChange	log2FoldChange	pval	padj	Regulation
Potri.013G001000.1	46.2419	88.2059	4.2779	0.048499	-4.3659	2.73474e-13	5.62575e-12	down
Potri.005G001600.1	21.1935	39.6384	2.7485	0.0693393	-3.85018	1.34575e-06	1.0766e-05	down
Potri.017G112300.1	38.6022	71.2562	5.94813	0.0834752	-3.58251	1.57553e-09	1.7452e-08	down
Potri.012G080400.1	6.70859	12.3741	1.04307	0.0842947	-3.56841	0.0101718	0.0443859	down
Potri.008G064200.1	18.4584	33.1605	3.75637	0.113278	-3.14206	6.42472e-05	0.000420527	down
Potri.012G060300.1	12.9216	23.1651	2.67809	0.115609	-3.11268	0.000874373	0.00484268	down
Potri.009G134000.1	897.155	1561.08	233.234	0.149406	-2.74269	6.12264e-13	1.10207e-11	down
Potri.004G088100.1	149.12	224.297	73.9434	0.329667	-1.60092	2.3907e-06	1.8119e-05	down
Potri.019G045900.1	268.044	380.71	155.377	0.408126	-1.29291	1.3901e-05	9.53212e-05	down
Potri.014G111200.1	68.2752	96.7597	39.7906	0.411231	-1.28198	0.00206219	0.0108627	down
Potri.012G084100.1	40.2653	56.6326	23.8981	0.421985	-1.24473	0.0112144	0.0474963	down
Potri.002G185900.1	90.0655	124.448	55.6831	0.447442	-1.16023	0.00211218	0.0108627	down
Potri.016G112300.1	385.021	519.326	250.717	0.482774	-1.05058	0.000213794	0.00133853	down
Potri.007G048900.1	1479.68	864.677	2094.69	2.42251	1.2765	0.000379068	0.00227441	up
Potri.009G027300.1	312.239	154.123	470.356	3.05182	1.60967	5.15855e-08	4.6427e-07	up
Potri.010G240800.1	356.769	156.732	556.807	3.5526	1.82888	3.64098e-10	4.36918e-09	up
Potri.019G081500.1	134.382	58.5711	210.194	3.58869	1.84346	1.05013e-07	8.89521e-07	up
Potri.T011400.1	46.6269	19.3325	73.9213	3.82367	1.93496	0.00530423	0.024639	up
Potri.008G122100.1	516.965	185.539	848.39	4.57257	2.193	1.08402e-12	1.73443e-11	up
Potri.004G033100.1	167.153	50.288	284.018	5.64784	2.4977	2.01999e-09	2.07771e-08	up
Potri.002G122600.1	1649.42	395.799	2903.04	7.33464	2.87473	3.93942e-26	1.89092e-24	up
Potri.008G101400.1	73.498	13.2545	133.742	10.0903	3.33489	1.68582e-13	4.04596e-12	up
Potri.011G041600.1	45.1778	6.73627	83.6193	12.4133	3.63381	5.39491e-11	7.06242e-10	up
Potri.010G123000.1	46.3982	6.7807	86.0157	12.6854	3.66509	2.27239e-11	3.27224e-10	up
Potri.017G082500.1	534.905	74.6889	995.122	13.3236	3.73591	6.60627e-34	4.75652e-32	up
Potri.001G235500.1	42.3195	4.40199	80.2371	18.2275	4.18804	1.92795e-08	1.85083e-07	up
Potri.009G096000.1	100.204	8.76365	191.645	21.8682	4.45076	5.51317e-23	1.58779e-21	up
Potri.010G149900.1	327.504	18.1008	636.907	35.1867	5.13696	7.176e-24	2.58336e-22	up
Potri.015G046200.1	333.542	13.5211	653.564	48.3366	5.59504	5.59108e-50	8.05116e-48	up
Potri.004G026600.1	4.60908	0	9.21816	Inf	Inf	0.00419379	0.0201302	up
Potri.005G112000.1	10.48	20.96	0	0	#NAME?	7.41061e-06	5.33564e-05	down
Potri.018G005300.1	6.58282	13.1656	0	0	#NAME?	0.00058186	0.00335151	down
Potri.006G275900.1	5.13099	10.262	0	0	#NAME?	0.00339711	0.0168684	down

## Sheet: Stem
id	baseMean	stem(C)_baseMean	stem(T)_baseMean	foldChange	log2FoldChange	pval	padj	Regulation
Potri.004G102600.1	36.2406	64.759	7.72222	0.119245	-3.06799	0.000133928	0.00254463	down
Potri.014G111200.1	67.0235	117.602	16.445	0.139836	-2.83819	1.83289e-06	5.22375e-05	down
Potri.008G064200.1	130.598	225.235	35.9607	0.159658	-2.64694	1.50073e-09	1.17608e-07	down
Potri.009G134000.1	180.48	296.745	64.2152	0.216398	-2.20824	3.75596e-09	1.60567e-07	down
Potri.013G067000.1	46.7161	73.9271	19.5051	0.263843	-1.92225	0.00443985	0.0446596	down
Potri.007G007900.1	66.3759	99.8778	32.874	0.329142	-1.60322	0.00434943	0.0446596	down
Potri.016G112300.1	356.443	477.771	235.115	0.492109	-1.02295	0.00112314	0.0128038	down
Potri.012G055600.1	232.144	147.98	316.308	2.13751	1.09593	0.000567695	0.00882508	up
Potri.010G240800.1	607.107	320.592	893.622	2.78741	1.47893	2.0633e-09	1.17608e-07	up
Potri.009G027300.1	282.626	148.215	417.037	2.81373	1.49249	6.6663e-07	2.27987e-05	up
Potri.008G101400.1	58.7777	22.0574	95.4979	4.32952	2.11421	0.00051104	0.00873879	up
Potri.009G096000.1	41.5012	13.1246	69.8778	5.32421	2.41257	0.000933881	0.0114067	up
Potri.001G408700.1	77.9716	23.9097	132.033	5.52216	2.46523	3.79464e-06	9.26977e-05	up
Potri.015G046200.1	220.521	22.0102	419.033	19.0381	4.25082	7.20907e-27	1.23275e-24	up
Potri.018G005300.1	14.0195	28.039	0	0	#NAME?	0.000891211	0.0114067	down

## Sheet: Root
id	baseMean	root(C)_baseMean	root(T)_baseMean	foldChange	log2FoldChange	pval	padj	Regulation
Potri.005G001600.1	95.0063	178.796	11.2166	0.0627339	-3.99461	2.37139e-19	2.97214e-18	down
Potri.015G033600.1	12.235	22.8312	1.6387	0.0717746	-3.80038	0.000909587	0.00322646	down
Potri.008G064200.1	112.991	209.881	16.1002	0.0767112	-3.70442	7.40722e-20	9.94684e-19	down
Potri.009G007100.1	22.8482	41.743	3.95337	0.0947073	-3.40038	1.73223e-05	6.92891e-05	down
Potri.002G173900.1	109.081	197.498	20.6647	0.104632	-3.2566	3.63748e-12	2.97325e-11	down
Potri.009G042600.1	69.3183	121.893	16.7438	0.137365	-2.86392	3.98918e-10	2.67845e-09	down
Potri.008G128500.1	20.1659	35.4158	4.9161	0.138811	-2.84881	0.000452962	0.00163763	down
Potri.003G144300.1	65.5104	114.791	16.23	0.141387	-2.82228	1.49176e-09	9.0468e-09	down
Potri.001G235500.1	148.45	258.301	38.5983	0.149431	-2.74245	9.62898e-16	1.00569e-14	down
Potri.015G082700.1	36.5543	63.1466	9.96194	0.157759	-2.66421	8.45337e-06	3.69589e-05	down
Potri.005G074500.1	24.7454	42.7414	6.7494	0.157913	-2.6628	0.000202087	0.000744949	down
Potri.009G027300.1	362.037	621.907	102.166	0.164279	-2.60578	6.94872e-23	1.08863e-21	down
Potri.013G067000.1	52.5245	88.8191	16.23	0.182731	-2.45221	9.23647e-07	4.34114e-06	down
Potri.010G093000.1	20.3051	34.3097	6.30047	0.183635	-2.44509	0.00151781	0.00528422	down
Potri.001G336700.1	33.428	55.7692	11.0868	0.198799	-2.33062	0.000133554	0.000512412	down
Potri.013G001000.1	14.9628	24.8797	5.04584	0.202809	-2.3018	0.0104929	0.0294429	down
Potri.006G097300.1	50.7659	84.1769	17.3549	0.206172	-2.27808	5.19975e-06	2.32751e-05	down
Potri.005G164900.1	20.3502	33.4372	7.2632	0.217219	-2.20278	0.00407469	0.0127674	down
Potri.016G112300.1	182.004	298.542	65.4661	0.219286	-2.18912	1.35155e-12	1.15496e-11	down
Potri.004G138000.1	87.9137	143.562	32.2653	0.224749	-2.15362	6.26845e-08	3.27352e-07	down
Potri.T011400.1	118.301	193.088	43.5144	0.22536	-2.14969	1.56678e-09	9.20481e-09	down
Potri.002G122600.1	506.989	827.444	186.534	0.225434	-2.14922	5.27687e-19	6.20032e-18	down
Potri.006G123400.1	454.459	733.893	175.025	0.238489	-2.06801	3.75268e-17	4.15002e-16	down
Potri.004G174400.1	37.5329	57.7758	17.29	0.29926	-1.74053	0.00178007	0.00605202	down
Potri.001G005100.1	37.7007	57.5003	17.9011	0.311322	-1.68352	0.00238236	0.00772213	down
Potri.013G046300.1	184.726	281.488	87.9641	0.312497	-1.67808	2.13547e-08	1.21657e-07	down
Potri.014G035100.1	175.406	267.12	83.6916	0.313311	-1.67433	3.62856e-08	1.94906e-07	down
Potri.009G134000.1	146.875	213.022	80.7282	0.378967	-1.39986	1.23407e-05	5.15568e-05	down
Potri.012G140500.1	38.1304	54.9526	21.3082	0.387757	-1.36678	0.0118684	0.0328125	down
Potri.018G095900.1	182.605	116.867	248.344	2.125	1.08747	0.000191709	0.000720827	up
Potri.003G189700.1	92.1396	57.8037	126.475	2.18801	1.12962	0.00226437	0.00746845	up
Potri.010G240800.1	695.44	385.603	1005.28	2.60703	1.38241	4.61859e-10	2.99412e-09	up
Potri.006G221800.1	276.793	150.332	403.254	2.68241	1.42353	0.0164551	0.0435712	up
Potri.008G101400.1	408.274	203.302	613.245	3.01642	1.59284	5.20012e-11	3.76008e-10	up
Potri.007G067600.1	22.5752	10.1488	35.0017	3.44886	1.78612	0.0103127	0.0293757	up
Potri.005G096600.1	28.0268	10.9654	45.0882	4.11187	2.0398	0.0149211	0.0406547	up
Potri.015G129100.1	147.205	55.298	239.112	4.32407	2.11239	5.74164e-11	3.99789e-10	up
Potri.015G046200.1	150.8	56.474	245.126	4.34051	2.11786	4.06445e-11	3.18382e-10	up
Potri.012G055600.1	205.606	76.3702	334.841	4.38445	2.1324	3.61265e-13	3.39589e-12	up
Potri.019G036400.1	319.212	117.828	520.595	4.41827	2.14348	3.8152e-05	0.000149429	up
Potri.006G275900.1	16.4131	5.92593	26.9003	4.53942	2.18251	0.00824059	0.0242746	up
Potri.017G099500.1	15.2227	5.15126	25.294	4.91026	2.2958	0.00760269	0.0230533	up
Potri.001G219100.1	1238.98	362.464	2115.49	5.83643	2.54509	3.51372e-23	6.00527e-22	up
Potri.005G224100.1	1018.28	287.721	1748.83	6.07823	2.60365	1.28074e-22	1.85215e-21	up
Potri.005G063200.1	10.5363	2.97695	18.0957	6.07862	2.60374	0.0153323	0.0411783	up
Potri.014G100800.1	35.9414	9.33215	62.5506	6.70271	2.74474	0.0185787	0.048511	up
Potri.002G185900.1	67.335	14.717	119.953	8.15066	3.02692	1.12144e-05	4.7916e-05	up
Potri.004G086300.1	541.103	117.73	964.477	8.19228	3.03427	3.26923e-23	6.00527e-22	up
Potri.002G038500.1	1124.21	233.852	2014.57	8.6147	3.1068	2.78266e-43	7.47342e-42	up
Potri.013G149200.1	45.6826	8.03035	83.3348	10.3775	3.37538	9.37335e-10	5.87397e-09	up
Potri.010G149900.1	1019.64	151.135	1888.15	12.4931	3.64306	1.12499e-54	4.22996e-53	up
Potri.008G166700.1	4375.39	618.964	8131.81	13.1378	3.71565	8.9013e-68	4.18361e-66	up
Potri.010G064000.1	346.599	45.1912	648.008	14.3392	3.8419	1.28749e-41	3.02559e-40	up
Potri.014G117000.1	1906.56	192.062	3621.06	18.8536	4.23677	1.53932e-76	9.6464e-75	up
Potri.011G125900.1	19.2626	1.27384	37.2515	29.2435	4.87004	3.93999e-07	1.94926e-06	up
Potri.013G149100.1	26.0207	1.67515	50.3662	30.0667	4.91009	1.01536e-07	5.15914e-07	up
Potri.002G191800.1	1416.44	73.8644	2759.01	37.3524	5.22313	2.60438e-97	2.44812e-95	up
Potri.008G089200.1	36.5813	0.844564	72.318	85.6275	6.42	2.71473e-14	2.68615e-13	up
Potri.017G130300.1	1513.91	34.9166	2992.91	85.7159	6.42149	2.36003e-125	4.43685e-123	up
Potri.019G118700.1	160.313	1.24588	319.38	256.349	8.00197	3.86164e-52	1.20998e-50	up
Potri.011G040300.1	56.6615	0	113.323	Inf	Inf	6.76936e-25	1.41404e-23	up
Potri.014G054700.1	27.1274	0	54.2547	Inf	Inf	5.25896e-13	4.70802e-12	up
Potri.001G347200.1	22.5304	0	45.0609	Inf	Inf	4.92254e-11	3.70175e-10	up
Potri.004G026600.1	16.2786	0	32.5573	Inf	Inf	2.91642e-08	1.61261e-07	up
Potri.017G075000.1	11.4897	0	22.9794	Inf	Inf	4.57792e-06	2.09914e-05	up
